# Supplementary material for: Empirical evaluation of humpback whale telomere length estimates; quality control and factors causing variability in the singleplex and multiplex qPCR methods
Source: PubMed Central journal article supplement (PMC3489520; doi:10.1186/1471-2156-13-77), 2012-09-06

**Supplementary Figure 2**

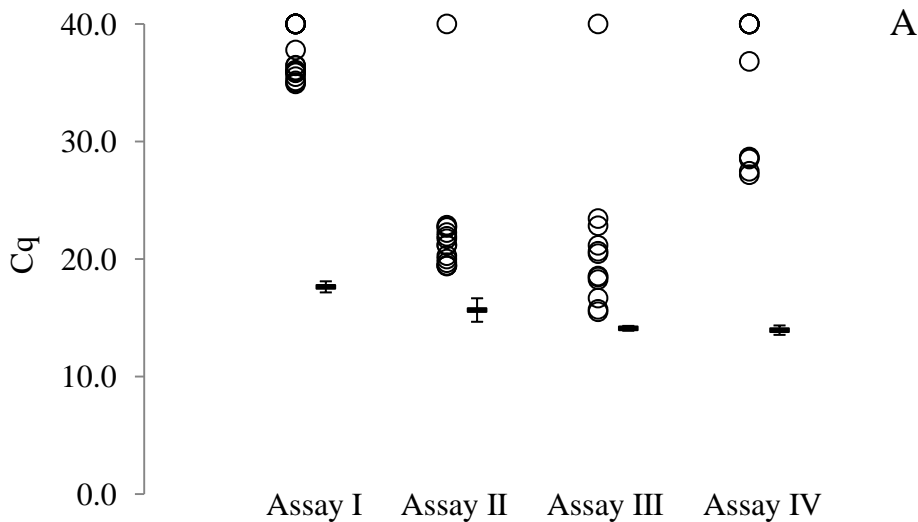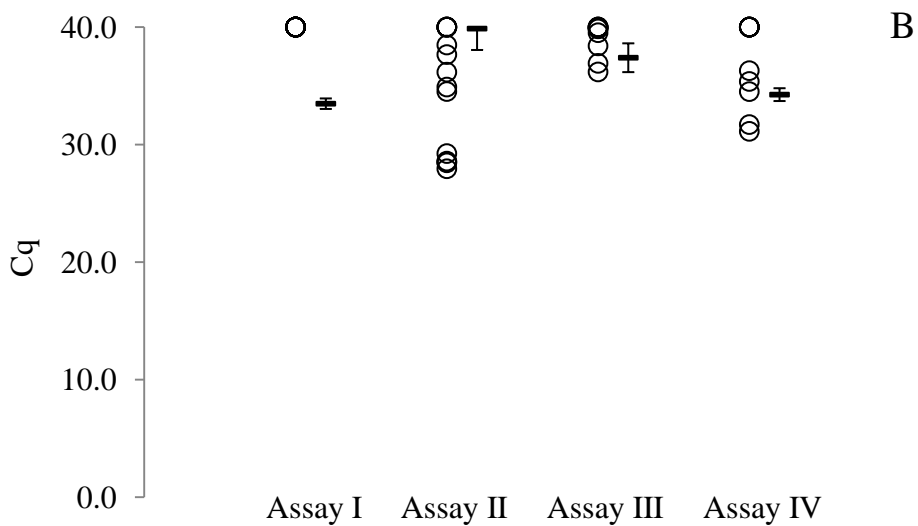

Supplement: 1471-2156-13-77-S3.pdf [file 1471-2156-13-77-S3.pdf]
